# Supplementary material for: Phenomenological Strands for Gaming Disorder and Esports Play: A Qualitative Registered Report
Source: Oxford University Press journal article supplement (doi:10.1525/collabra.38819), 2022-01-01
Supplement: collabra_2022_8_1_38819_101850.docx [file collabra_2022_8_1_38819_101850.docx]

**Peer Review and Communication History**

**MS Title**: Phenomenological Strands for Gaming Disorder and Esports Play: A Qualitative Registered Report

**Author Names**: Veli-Matti Karhulahti, Miia Siutila, Jukka Vahlo, Raine Koskimaa

**Submitted:** Sep 21, 2022

**Note**

Accepted Stage 1: <https://rr.peercommunityin.org/articles/rec?id=44>

Preregistered Stage 1 protocol: <https://osf.io/a2rwg>(date of in-principle acceptance: 24/09/2021)

Note: Stage 1 preregistration includes a 1-year follow-up study with the same participants. The study is underway and will be completed in early 2023 by estimate.

**Editor Final Decision:** Accept

Sep 30, 2022

Dear Veli-Matti Karhulahti,

I have now had a chance to read over your manuscript “Phenomenological Strands for Gaming Disorder and Esports Play: A Qualitative Registered Report”. I am happy to say that your paper is now officially accepted for publication in Collabra: Psychology. Congratulations on this excellent work, I think it will make an important contribution to the literature and I look forward to seeing it published! I hope your experiences with Collabra: Psychology have been positive and that you will continue to consider it as an outlet for your work.

As there are no further reviewer revisions to make, you do not have to complete any tasks at this point.

You will be receiving separate correspondence regarding any production and technical comments, data deposits, as well as publication charges. We work with the Copyright Clearance Center to process any applicable APC charges. Please note that your APC transaction must be completed before your article gets published.

You will have an opportunity to check the page proofs before we publish your article. Thank you again for publishing in Collabra: Psychology.

Sincerely,
Kevin King
